# Supplementary material for: The historical development of complex global trafficking networks for marine wildlife
Source: PubMed Central journal article supplement — Sci Adv. 2019 Mar 27;5(3):eaav5948. doi: 10.1126/sciadv.aav5948 (PMC6449156; doi:10.1126/sciadv.aav5948), 2019-03-27
Supplement: aav5948_SM.pdf [file aav5948_SM.pdf]

## Supplementary Materials for

### **The historical development of complex global trafficking networks for marine wildlife**

Emily A. Miller\*, Loren McClenachan, Yoshikazu Uni, George Phocas, Molly E. Hagemann, Kyle S. Van Houtan

\*Corresponding author. Email: [emmiller@mbayaq.org](mailto:emmiller@mbayaq.org)

Published 27 March 2019, *Sci. Adv.* **5**, eaav5948 (2019)

DOI: 10.1126/sciadv.aav5948

#### **The PDF file includes:**

Fig. S1. Japan was the major importer of tortoiseshell from 1844 to 1992.

Fig. S2. Turtle exports per country varied in relation to CITES trade ban.

Fig. S3. Illegally trafficked hawksbill sea turtle parts and products are seized entering the United States from more than 70 countries.

Fig. S4. Seized hawksbill sea turtles are trafficked to the United States largely by air transportation and in raw forms more frequently than processed tortoiseshell.

Fig. S5. Power law models show the relationship between calculated precise and crude areas for individual scutes and scute groupings from hawksbill sea turtles.

Fig. S6. Hawksbill sea turtle specimens used in this study were a range of sizes.

Fig. S7. Demographically explicit scenarios produce different estimates of the number of hawksbill sea turtles harvested.

Table S1. Hawksbill sea turtle export data curation methods.

Table S2. Model parameters for tortoiseshell morphometric relationships in Fig. 1.

Table S3. Complete list of United Nations country abbreviations (alpha 2) used in Fig. 4 and figs. S1 and S3.

Legends for dataset S1 to S3

#### **Other Supplementary Material for this manuscript includes the following:**

(available at [advances.sciencemag.org/cgi/content/full/5/3/eaav5948/DC1](https://advances.sciencemag.org/cgi/content/full/5/3/eaav5948/DC1))

Dataset S1. (.csv format). Hawksbill sea turtle historical trade records.

Dataset S2. (Microsoft Excel format). Hawksbill sea turtle scute morphometrics.

Dataset S3. (Microsoft Excel format). U.S. seizure records of hawksbill sea turtles.

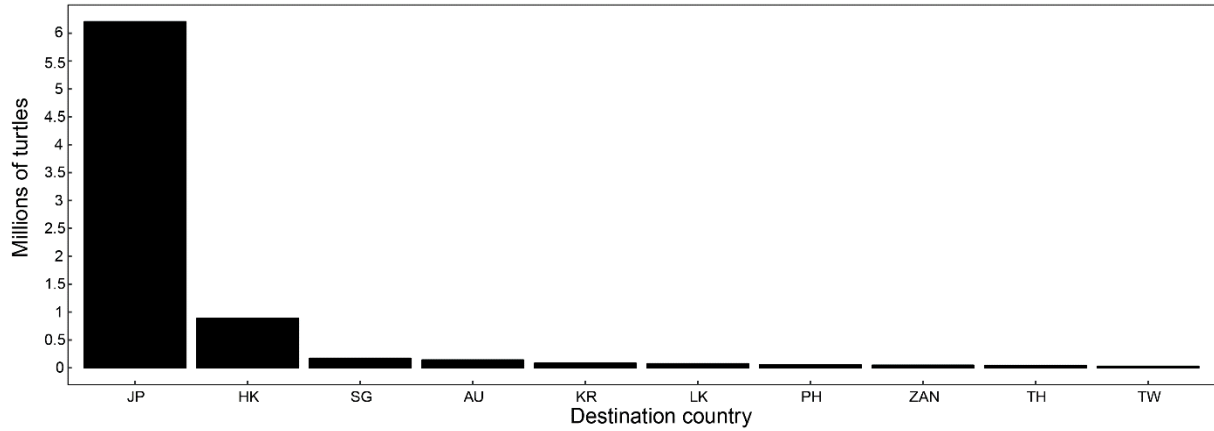

**Fig. S1. Japan was the major importer of tortoiseshell from 1844 to 1992.** The top ten tortoiseshell-importing countries, listed by descending rank, in millions of turtles. Volumes of shipments that had multiple destinations were redistributed among importing countries proportionate to the volume each imported as a solo destination. Two-letter UN country codes are shown, the full list is provided in Table S2.

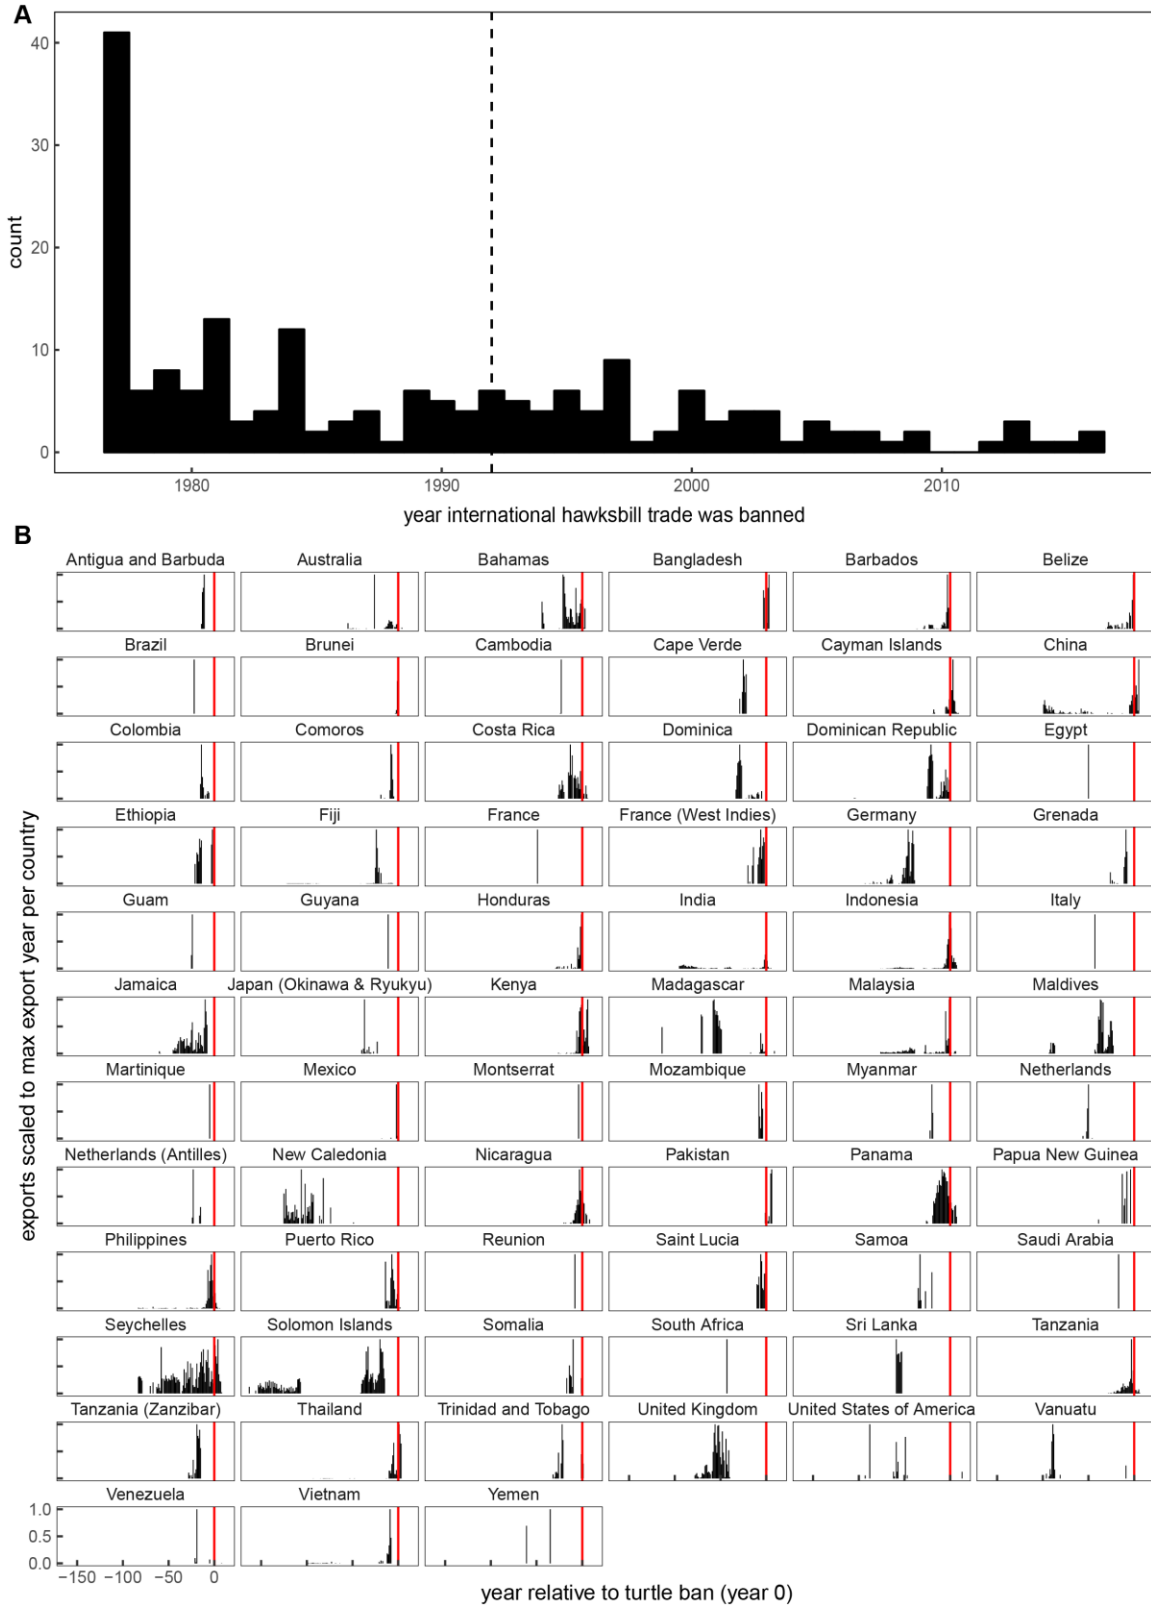

**Fig. S2. Turtle exports per country varied in relation to CITES trade ban.** (A) Year the international trade of hawksbill sea turtles was banned per country. The hawksbill sea turtle was listed globally as an

Appendix 1 species in 1977 for all signatories, making it the earliest ban year. After 1977, international trade was banned for each country through accession to CITES or the end of a CITES reservation. Dashed line indicates the year our dataset ends, the year Japan ended their CITES reservation. **(B)** Turtle exports in relation to trade ban. Export volumes per year are scaled to the maximum annual export per country. The year each country agreed to ban international trade of hawksbill sea turtles, is scaled to year 0, denoted by the red line. Of the countries in our trade dataset, several signatories are not included: Cuba, Palau, and Saint Vincent and the Grenadines continue to have reservations, and Haiti and Turks and Caicos never signed onto CITES.

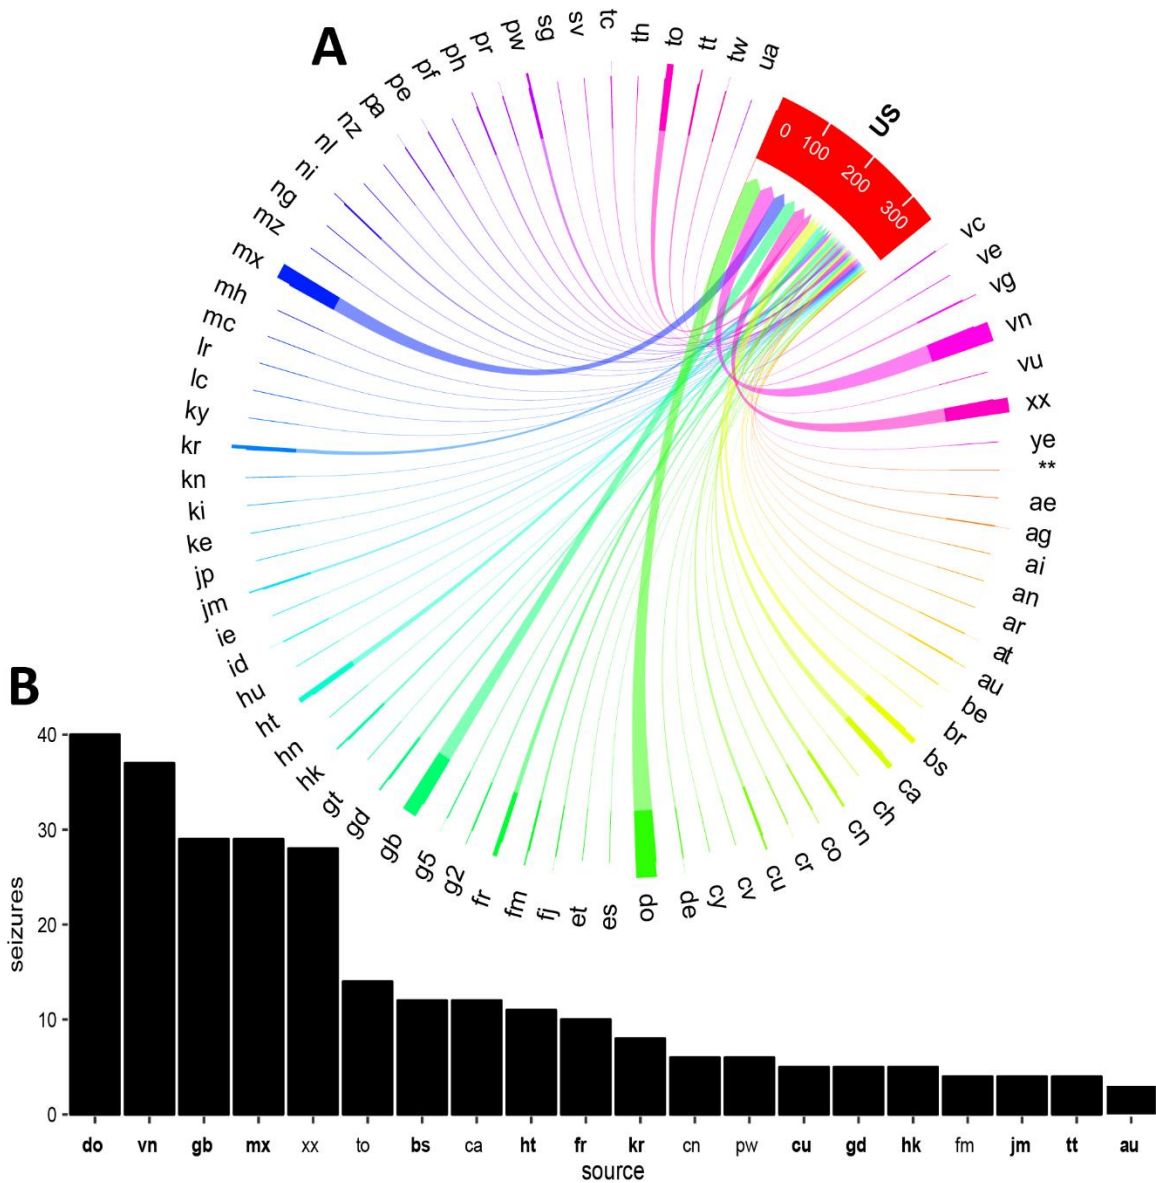

**Fig. S3. Illegally trafficked hawksbill sea turtle parts and products are seized entering the United States from more than 70 countries.** The global trafficking network remains complex in the modern era, as seen in this segment of trade entering a single country. **(A)** Chord diagram demonstrates trafficking routes between exporting countries and the US. Arrow width is proportionate to the number of seizures. **(B)** Top 20 tortoiseshell-exporting countries to the US, listed in number of seizures. Data are USFWS OLE seizure records at US ports of entry from 1999-2018. Units are number of seizures.

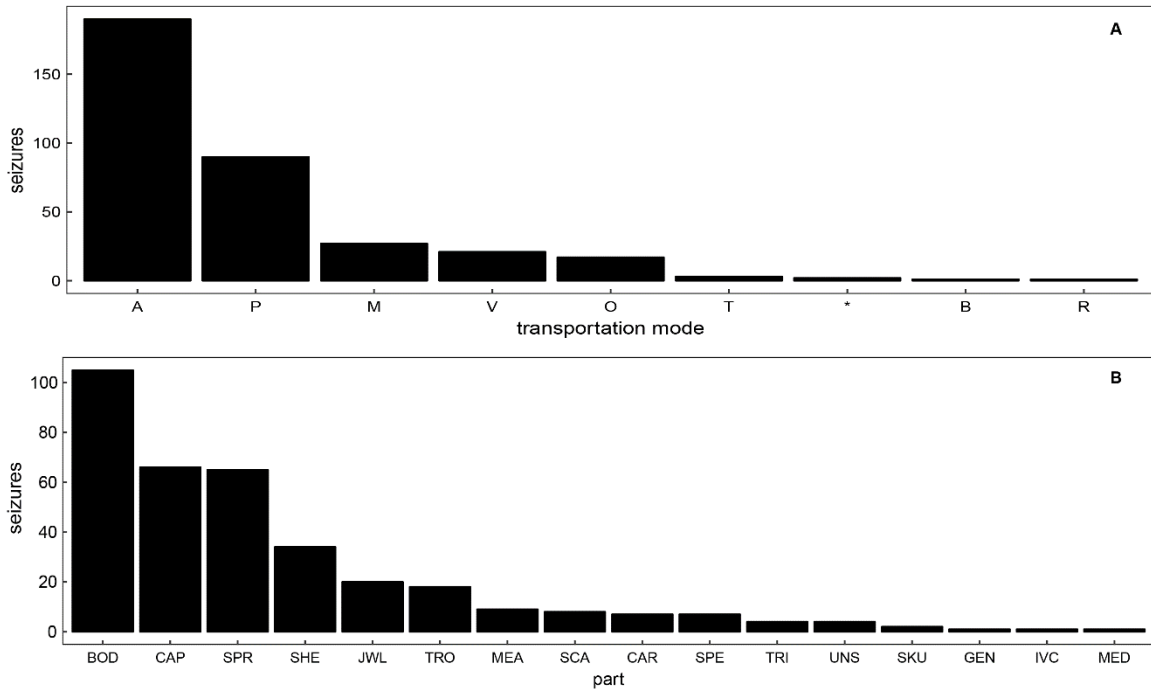

**Fig. S4. Seized hawksbill sea turtles are trafficked to the United States largely by air transportation and in raw forms more frequently than processed tortoiseshell.** (A) Frequency of hawksbill sea turtle seizures at US ports by transportation mode. Transportation modes: A=air cargo, P=personal accompanying baggage, M=mail, V=personal vehicle, O=ocean cargo, T=truck or commercial vehicle, \*=unknown, B=border crossing on foot, and R=rail. (B) Frequency of hawksbill sea turtle seizures at US ports by part or product. BOD=whole dead animal, CAP=raw or unworked carapace, SPR=shell product, SHE=raw unworked shell, JWL=jewelry, TRO=trophy (all the parts of one animal), MEA=meat, SCA=scale, CAR=carvings, SPE=scientific or museum specimen, TRI=trim (shoe, garment, or decorative), UNS=unspecified, SKU=skull, GEN=genitalia (castrated and dried penis), IVC=ivory carvings, MED=medicinal part or product. Data are USFWS OLE seizure records at US ports of entry from 1999-2018. Units are number of seizures.

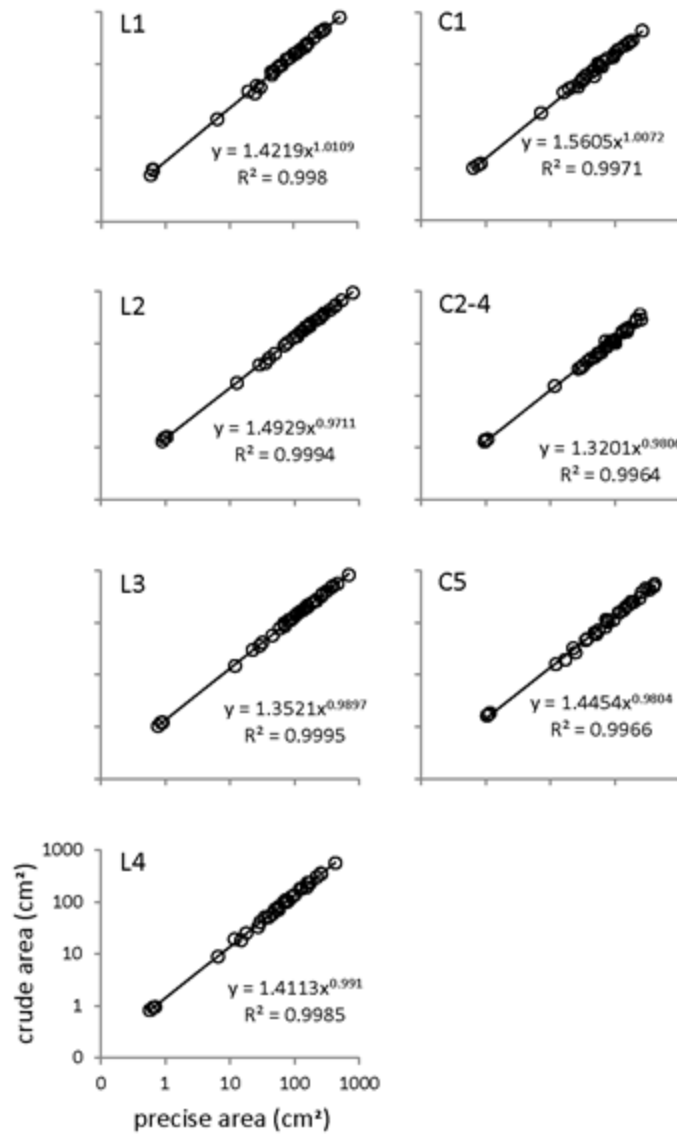

**Fig. S5. Power law models show the relationship between calculated precise and crude areas for individual scutes and scute groupings from hawksbill sea turtles.** Precise area is the exact scute area calculated by scanning traced scute outlines into ArcGIS, geo-referencing the scans, generating polygons, and calculating their areas. The crude area is a simplistic proxy, composed of the longest length and widest width when each scute is laid flat on a gridded surface. This latter method calculates the area of the rectangle each scute sits within, and therefore necessarily overestimates each scute's area. However, this number characteristically varies in proportion to the true, or precise area (see Fig. 1B), for each scute. The above power law relationships, for all replicates, have  $R^2 > 0.996$ . These relationships are therefore reliable as a rapid method to assess many scutes – e.g. to assess a large seizure for its contents – to determine their precise area, which in turn can be used to calculate their length and demographic.

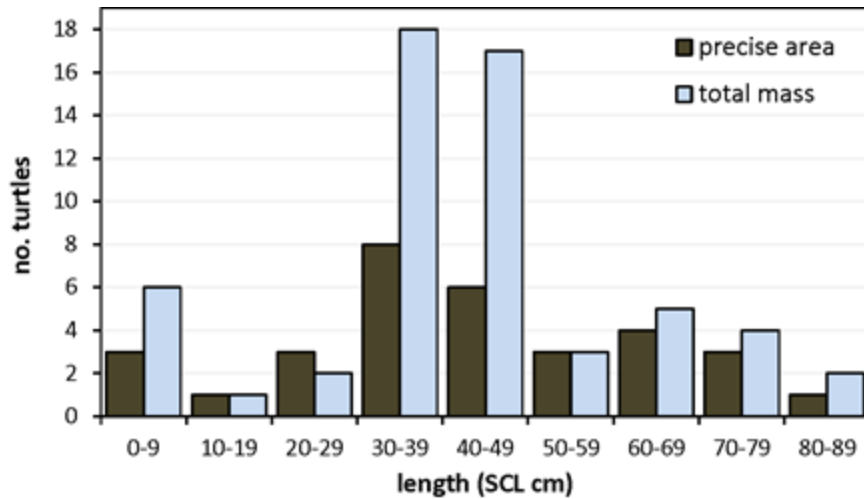

**Fig. S6. Hawksbill sea turtle specimens used in this study were a range of sizes.** A total of 58 carapaces (light blue columns) from hawksbill sea turtles were obtained from law enforcement seizures and strandings networks. These specimens ranged from 4.1 to 89.1 cm (ave = 42.0, sd = 19.6 cm), representing all demographics from emerged hatchlings to large breeding adults. Like most sea turtle studies, the overall specimen set was dominated by small juveniles that recently have recruited to coastal reef ecosystems. All of these specimens were measured for straight carapace length (SCL), disassociated into individual scute plates, and each scute plate was weighed. Individual scute mass data were summed and related to SCL to develop a general scaling rule for the mass of tortoiseshell an individual turtle of a given length might produce (see Fig. 1C). A subset of this number, 32 carapaces (dark brown columns), were additionally examined for the precise area each scute contains. These area data were used as a basis for understanding the demographic of unlabeled (not containing any further metadata) and disintegrated scute plates obtained from law enforcement.



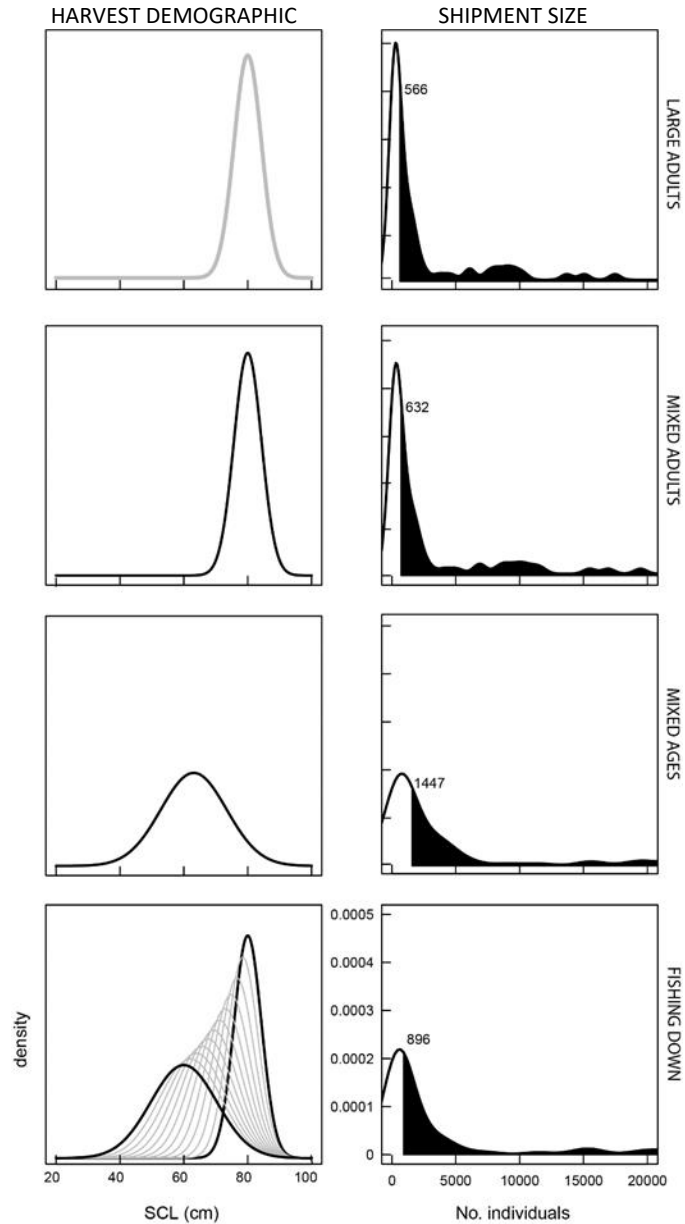

**Fig. S7. Demographically explicit scenarios produce different estimates of the number of hawksbill sea turtles harvested.** Demographic distributions are shown in the left column for each of the four harvest scenarios. The right column shows an example of the median shipment size in numbers of turtles for the entire time series of exports from the Philippines. Harvest scenarios from top to bottom: Large adults – all harvested individuals were a fixed size of 80 cm SCL, mixed adults – a range of adult sizes were harvested, mixed ages – adults and juveniles were harvested following the demographic distribution of a shipment seized in the 1980s (see Fig. 1), and fishing down – the distribution moves from mixed adults to mixed ages over time following population depletion.

**Table S1. Hawksbill sea turtle export data curation methods.** Hawksbill turtle export data were obtained from nine published sources (30, 48-54) and Japanese Customs archives. These data included both import and export data. In order to account for re-export, we discarded data from European countries, USA, and Canada after 1950, with the assumption that these data were recorded at the original point of export. For European countries prior to 1950, we reattributed turtles to source basins based on their colonial holdings.

| SOURCE COUNTRY | YEARS     | KG    | COLONIES DURING THIS PERIOD                                               | BASIN REATTRIBUTION                        |
|----------------|-----------|-------|---------------------------------------------------------------------------|--------------------------------------------|
| Europe         | 1936      | 163   | n/a                                                                       | Split equally                              |
| France         | 1935      | 259   | West Atlantic (Dahomy, Guinea), Indian Ocean (French Somaliland), Oceania | Split between Indian and Pacific           |
| Germany        | 1884-1949 | 49931 | Indian Ocean (German East Africa), Pacific (Samoa, New Guinea)            | Split between Indian and Pacific           |
| Italy          | 1936      | 42    | Indian Ocean (Italian East Africa)                                        | Indian                                     |
| Netherlands    | 1928-1949 | 15642 | Indian Ocean (Dutch East Indies), Atlantic (Curacao, Surinam)             | Split between Indian and Atlantic          |
| North America  | 1918      | 230   | n/a                                                                       | Split equally                              |
| UK             | 1899-1949 | 69678 | Multiple, all basins                                                      | Split equally                              |
| USA            | 1884-1949 | 5709  |                                                                           | Split equally between Atlantic and Pacific |

**Table S2. Model parameters for tortoiseshell morphometric relationships in Fig. 1.** Figure 1 shows the relationships between **(B)** straight carapace length (“SCL”) and the area (cm<sup>2</sup>) of each scute, as well as **(C)** individual length and total tortoiseshell mass. The model parameters associated with each relationship shown in Fig. 1 are listed below.

| FIGURE    | TOPIC                | SCUTE      | MODEL                     | $\beta_0$ | $\beta_1$ | R <sup>2</sup> |
|-----------|----------------------|------------|---------------------------|-----------|-----------|----------------|
| Figure 1B | length to scute area | L1         | $y = \beta_0 x^{\beta_1}$ | 0.02713   | 2.13161   | 0.994          |
| Figure 1B | length to scute area | L2         | $y = \beta_0 x^{\beta_1}$ | 0.04183   | 2.14637   | 0.996          |
| Figure 1B | length to scute area | L3         | $y = \beta_0 x^{\beta_1}$ | 0.03529   | 2.15432   | 0.996          |
| Figure 1B | length to scute area | L4         | $y = \beta_0 x^{\beta_1}$ | 0.02661   | 2.07922   | 0.991          |
| Figure 1B | length to scute area | C1         | $y = \beta_0 x^{\beta_1}$ | 0.04958   | 1.85766   | 0.991          |
| Figure 1B | length to scute area | C2-4       | $y = \beta_0 x^{\beta_1}$ | 0.07777   | 1.83390   | 0.991          |
| Figure 1B | length to scute area | C5         | $y = \beta_0 x^{\beta_1}$ | 0.05991   | 1.92357   | 0.983          |
| Figure 1C | length to scute mass | all scutes | $y = \beta_0 x^{\beta_1}$ | 9.04E-07  | 3.15519   | 0.979          |

**Table S3. Complete list of United Nations country abbreviations (alpha 2) used in Fig. 4 and figs. S1 and S3.** These are available at [https://en.wikipedia.org/wiki/ISO\\_3166-1\\_alpha-2](https://en.wikipedia.org/wiki/ISO_3166-1_alpha-2). Three alpha codes correspond to territories.

| ABBREV | COUNTRY              | ABBREV | COUNTRY               | ABBREV | COUNTRY                  |
|--------|----------------------|--------|-----------------------|--------|--------------------------|
| AE     | United Arab Emirates | GU     | Guam                  | NZ     | New Zealand              |
| AG     | Antigua and Barbuda  | GY     | Guyana                | OKI    | Okinawa                  |
| AI     | Anguilla             | HK     | Hong Kong             | PA     | Panama                   |
| AN     | Netherland Antilles  | HN     | Honduras              | PE     | Peru                     |
| AR     | Argentina            | HT     | Haiti                 | PF     | French Polynesia         |
| AT     | Austria              | HU     | Hungary               | PG     | Papua New Guinea         |
| AU     | Australia            | ID     | Indonesia             | PH     | Philippines              |
| BB     | Barbados             | IE     | Ireland               | PK     | Pakistan                 |
| BD     | Bangladesh           | IN     | India                 | PR     | Puerto Rico              |
| BE     | Belgium              | IT     | Italy                 | PW     | Palau                    |
| BN     | Brunei               | JM     | Jamaica               | RE     | Reunion                  |
| BR     | Brazil               | JP     | Japan                 | SA     | Saudi Arabia             |
| BS     | Bahamas              | KE     | Kenya                 | SB     | Solomon Islands          |
| BZ     | Belize               | KH     | Cambodia              | SC     | Seychelles               |
| CA     | Canada               | KI     | Kiribati              | SG     | Singapore                |
| CH     | Switzerland          | KM     | Comoros               | SO     | Somalia                  |
| CN     | China                | KN     | Saint Kitts and Nevis | SV     | El Salvador              |
| CO     | Colombia             | KR     | South Korea           | SSI    | South Sea Islands        |
| CR     | Costa Rica           | KY     | Cayman Islands        | STC    | St. Croix                |
| CU     | Cuba                 | LC     | Saint Lucia           | TC     | Turks and Caicos         |
| CUR    | Curacao              | LK     | Sri Lanka             | TH     | Thailand                 |
| CV     | Cape Verde           | LR     | Liberia               | TO     | Tonga                    |
| CY     | Cyprus               | MC     | Monaco                | TT     | Trinidad and Tobago      |
| DE     | Germany              | MG     | Madagascar            | TW     | Taiwan                   |
| DM     | Dominica             | MH     | Marshall Islands      | TZ     | Tanzania                 |
| DO     | Dominican Republic   | MM     | Myanmar               | UA     | Ukraine                  |
| EG     | Egypt                | MQ     | Martinique            | US     | United States of America |
| ES     | Spain                | MS     | Montserrat            | VC     | Saint Vincent Grenadines |
| ET     | Ethiopia             | MU     | Mauritius             | VE     | Venezuela                |
| FJ     | Fiji                 | MV     | Maldives              | VG     | British Virgin Islands   |
| FM     | Micronesia           | MX     | Mexico                | VN     | Vietnam                  |
| FR     | France               | MY     | Malaysia              | VU     | Vanuatu                  |
| G2     | Unknown              | MZ     | Mozambique            | YE     | Yemen                    |
| G5     | Unknown              | NC     | New Caledonia         | ZA     | South Africa             |
| GB     | United Kingdom       | NG     | Nigeria               | ZAN    | Zanzibar                 |
| GD     | Grenada              | NI     | Nicaragua             | XX     | Unknown                  |
| GT     | Guatemala            | NL     | Netherlands           | **     | Unknown                  |

**Additional dataset S1 (separate file)**

**Dataset S1. Hawksbill sea turtle historical trade records.** This dataset contains trade records of tortoiseshell shipments from 1844-1992. Records include the year of shipment, shipment mass (kg), source country, destination country, reference, and record type. Data were obtained from nine published sources (30, 48-54) and Japanese Customs archives, and curated (see Table S1).

**Additional dataset S2 (separate file)**

**Dataset S2. Hawksbill sea turtle scute morphometrics.** This dataset contains measurements of carapaces from 58 seized and stranded hawksbill sea turtles provided by USFWS Office of Law Enforcement and NOAA Pacific Islands Fisheries Science Center (USFWS permit TE-72088A-0), respectively. Specimens ranged from 4 to 89 cm SCL. Scute mass was calculated per specimen (see Materials and Methods). These data were used to determine the relationship between turtle morphometrics and scute mass produced.

**Additional dataset S3 (separate file)**

**Dataset S3. U.S. seizure records of hawksbill sea turtles.** This dataset contains records of seized hawksbill sea turtle parts and products entering U.S. ports of entry illegally from 1999-2018. The 352 records were obtained from USFWS Office of Law Enforcement (FOIA request #FWS-2018-00548).
